# Supplementary material
Source: PubMed Central journal article supplement (PMC6639248)

# **Supplemental Data File**

**TLR/MyD88/XBP1 signaling axis mediates skeletal muscle wasting  
during cancer cachexia**

By

Kyle R. Bohnert, Praneeth Goli, Anirban Roy, Aditya K. Sharma, Guangyan Xiong,  
Yann S. Gallot, and Ashok Kumar

**This file contains:** Figures S1-S4 and their legends

## SUPPLEMENTAL FIGURES' LEGENDS

**FIGURE S1. Characterization of muscle atrophy in response to tumor-derived factors.** 3-month old C57BL/6J mice were injected with saline alone or  $2 \times 10^6$  Lewis lung carcinoma (LLC) cells in the left flank. Average **(A)** body weight, and **(B)** forelimb strength of control and LLC-tumor bearing mice after 21 days of inoculation of LLC cells. N=4 in each group. C2C12 myotubes were treated with normal medium, LLC-CM, or C26-CM in 1:4 ratio for 72h. The cultures were then fixed and stained for MyHC protein using MF20 antibody. Nuclei were counterstained with DAPI. Representative images of the cultures are presented here. Scale bar: 20 $\mu$ m. **(D)** Average myotube diameter in control, LLC-CM, or C26-CM treated myotubes. The median and 25-75th percentiles are shown. \* $p < 0.05$ , values significantly different from their corresponding controls.

**FIGURE S2. Average muscle weight in control and LLC-tumor bearing mice.** 3-month old MyD88<sup>f/f</sup> and MyD88<sup>myoKO</sup> mice were inoculated with  $2 \times 10^6$  LLC cells in the left flank. After 21 days, the mice were euthanized and individual hind limb muscle weight was measured. Quantification of wet weight of **(A)** GA, **(B)** TA, and **(C)** soleus muscle of control and LLC-tumor bearing MyD88<sup>f/f</sup> and MyD88<sup>myoKO</sup> mice normalized with body weight. N=3 in each group. The median and 25-75th percentiles are shown. \* $p < 0.05$ , values significantly different from XBP1<sup>f/f</sup> mice injected with saline alone. & $p < 0.05$ , values significantly different from LLC-tumor-bearing MyD88<sup>f/f</sup> mice. ns, not significant.

**Figure S3. Recombinant Hsp70 protein activates UPR pathways in cultured myotubes.** C2C12 myotubes were treated with Hsp70 (100 ng/ml) for 24h followed by performing biochemical analysis. **(A)** Representative immunoblots showing levels of p-eIF2 $\alpha$ , eIF2 $\alpha$ , tXBP1, sXBP1, and Tubulin in control and Hsp70-treated myotubes. **(B)** Densitometry quantification of bands in immunoblots for p-eIF2 $\alpha$ , eIF2 $\alpha$ , tXBP1, and sXBP1 in control and Hsp70-treated C2C12 myotube cultures. **(C)** Relative mRNA levels

of *ATF4*, *CHOP*, *GADD34*, *GRP78*, and *sXBP1* in control and Hsp70-treated C2C12 myotubes. N=3 in each group. The median and 25-75th percentiles are shown. \*p<0.05, values significantly different from control myotube cultures. ns, not significant.

**FIGURE S4. Average muscle weight in control and LLC-tumor bearing *XBP1<sup>f/f</sup>* and *XBP1<sup>mKO</sup>* mice.** 3-month old *XBP1<sup>f/f</sup>* and *XBP1<sup>mKO</sup>* mice were inoculated with  $2 \times 10^6$  LLC cells in the left flank. After 21 days, the mice were euthanized and individual hind limb muscle weight was measured. Quantification of wet weight of (A) GA, (B) TA, and (C) soleus muscle of control and LLC-tumor bearing *XBP1<sup>f/f</sup>* and *XBP1<sup>mKO</sup>* mice normalized by body weight. N=3 in each group. The median and 25-75th percentiles are shown. \*p<0.05, values significantly different from *XBP1<sup>f/f</sup>* mice injected with saline alone. &p<0.05, values significantly different from LLC-tumor-bearing *XBP1<sup>f/f</sup>* mice. ns, not significant.

**FIGURE S1**

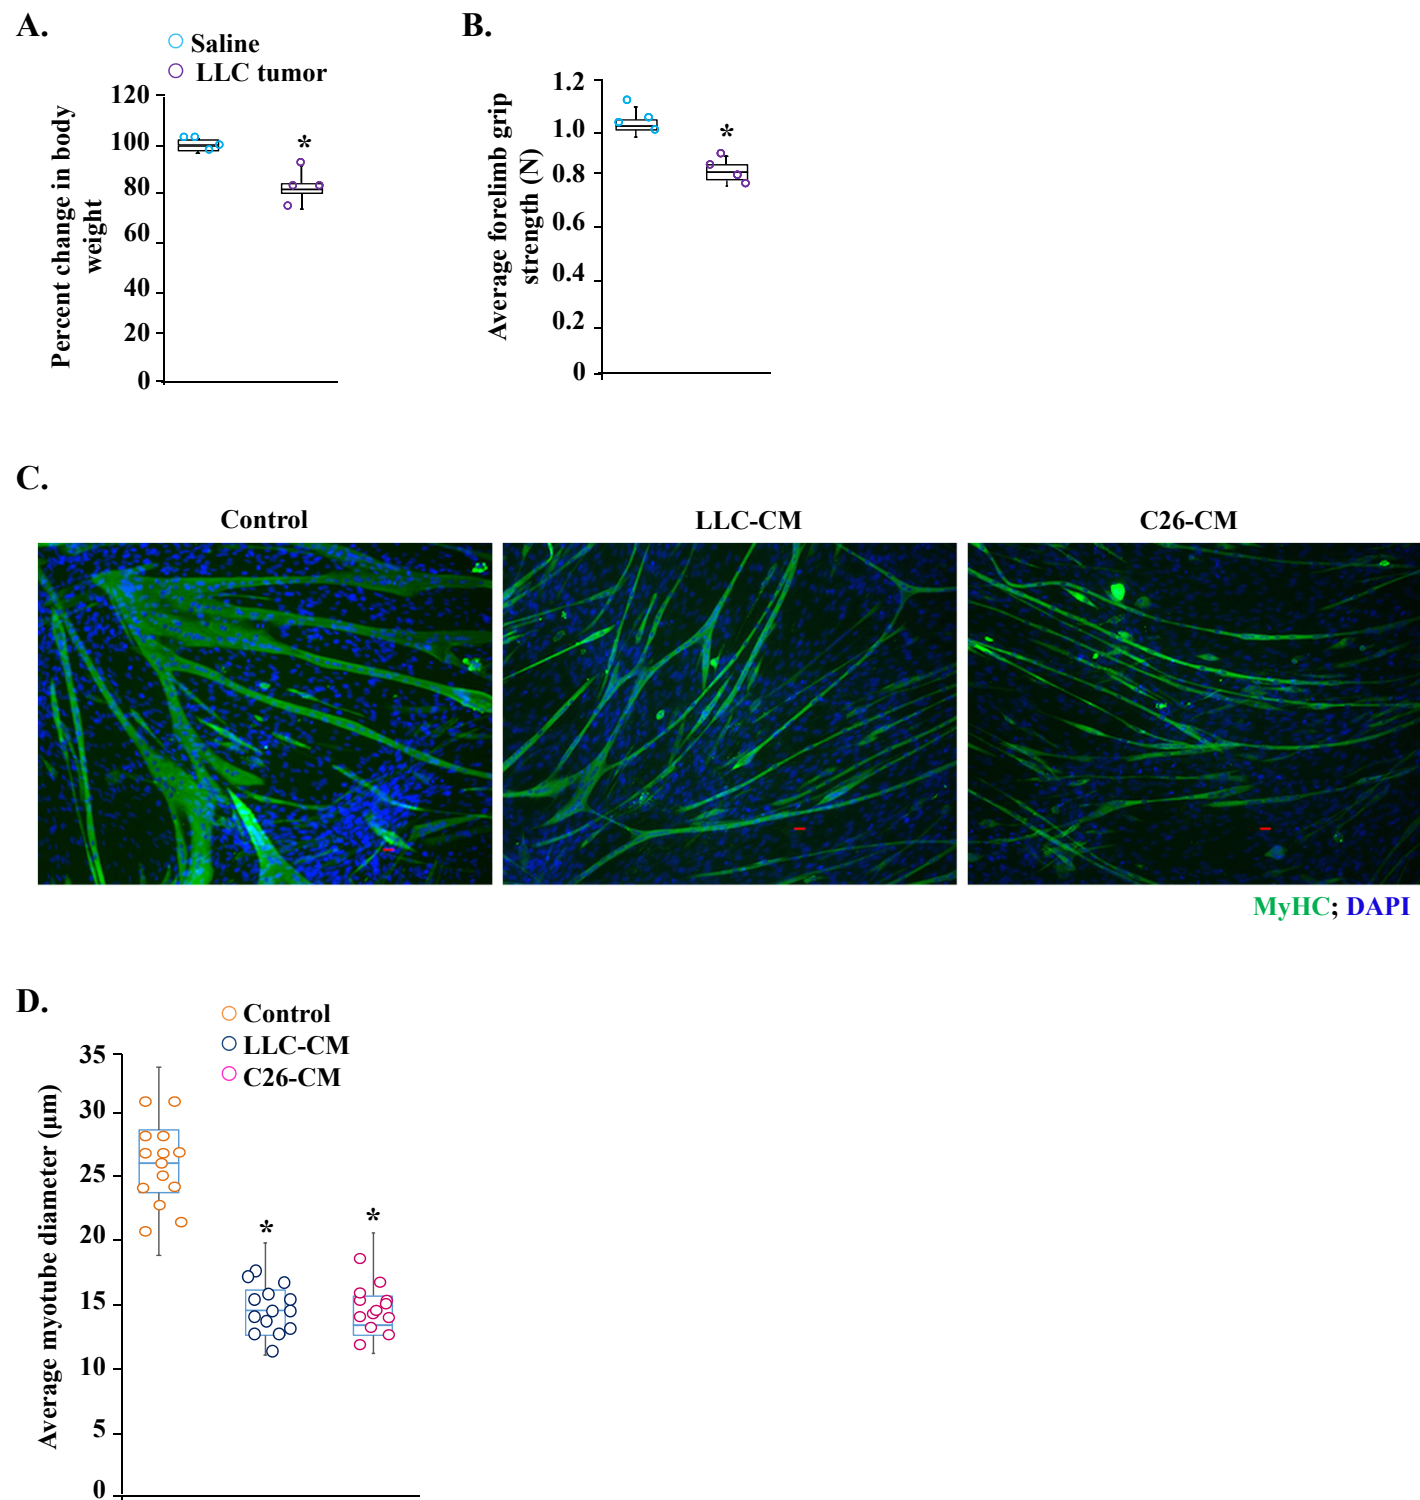

**FIGURE S2**

**A.**

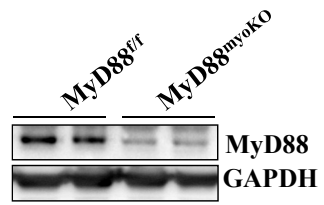

**B.**

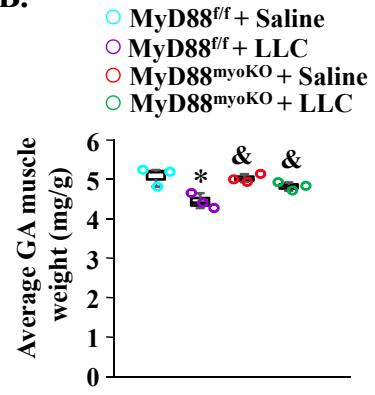

**C.**

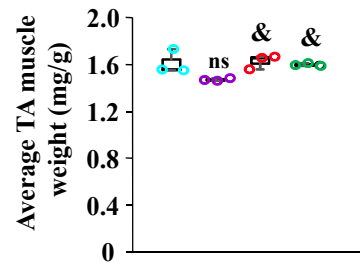

**D.**

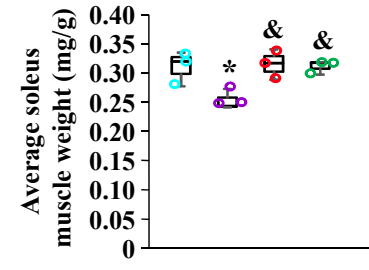

FIGURE S3

A.

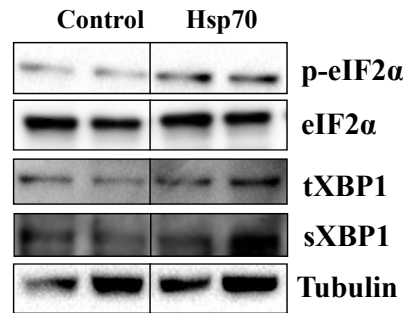

B.

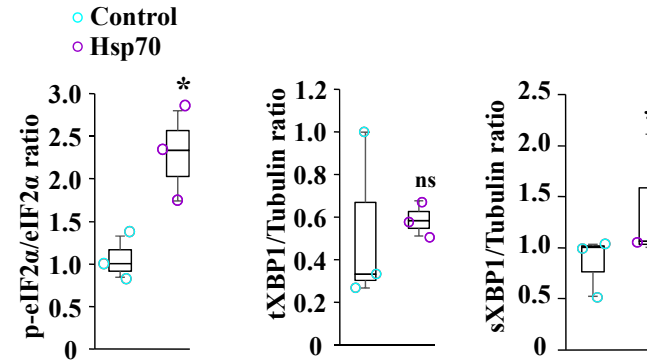

C.

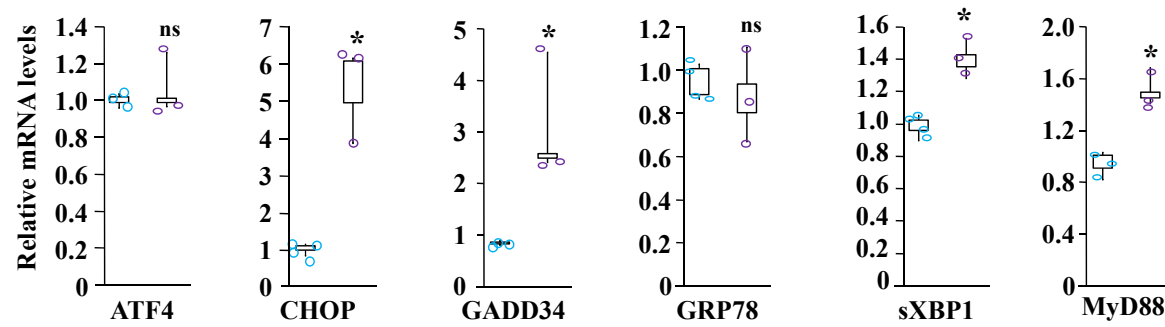

FIGURE S4

A.

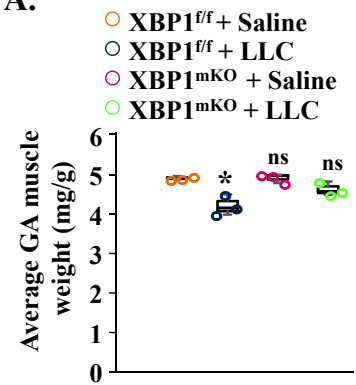

B.

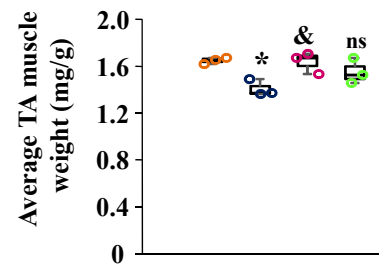

C.

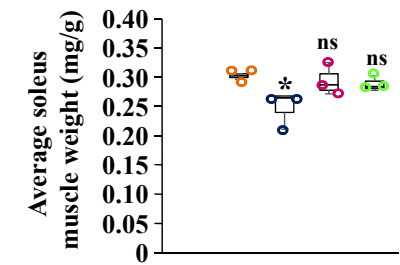

Supplement: MCB.00184-19-s0001.pdf [file MCB.00184-19-s0001.pdf]
